# Supplementary material for: A first trial to supplement local hardwood sawdust at the first soaking for the cultivation of Shiitake (Lentinula edodes)
Source: PeerJ. 2025 Feb 24;13:e18622. doi: 10.7717/peerj.18622 (PMC11867041; doi:10.7717/peerj.18622)
Supplement: Supplemental Information 1 [file peerj-13-18622-s001.xlsx]

## Sheet: Sheet1
Treatment	Stage 1	stage 2	Stage 3	Stage 4	Stage 5	fruiting	harvest	FN F1	FW F1	BY F1	FN F2	FW F2	BYF2	TBY	BE	PD F1	PL F1	SD F1	SL	PD/SL	firmness	Protein (N*6.25)%	Crude fiber(%)	fat content	ash content	moisture content	carbhydrates	Vit C as ascorbic acid (mg/100g)	Vit D2, as ergocalciferol ( µg/100g)	Vit D3, as colecalciferol ( µg/100g)
OS-WB: 800-200	16	21	35	58	70	75	79	36	8.2	202.9	29	8.09	290.3	493.2	49.32	3.8	1.16552	0.662069	2.18621	1.89144	5.4	2.8	1.4	0.3	0.7	89	7.2	4.5	<3	<3
OS-WB: 800-200	15	25	41	64	73	76	80	31	8.4	345.2	21	16.7	390.7	735.9	73.59	6.65556	1.2	1.14444	3.63333	2.3123	5.38	2.5	1.5	0.4	0.6	89.2	7.3	4.6	<3	<3
OS-WB: 800-200	16	24	35	60	74	77	82	28	8.8	320.5	22	14.5	343.5	664	66.4	6.65556	1.2	1.14444	3.63333	2.3123	4.3	2.7	1.6	0.2	0.6	89.2	7.3	4.4	<3	<3
OS-WB: 800-200	17	20	40	63	71	74	78	27	9.1	240.5	25	9.3	280.5	521	52.1	3.8	1.16552	0.662069	2.18621	1.89144	4.15
OS-WB: 800-200	14	24	38	65	70	74	78	27	9.7	280.6	23	10.8	340.6	621.2	62.12	5.4069	1.16207	0.853571	3.68621	1.49911	5.5
OS-WB: 800-200	16	23	35	58	75	77	80	28	8.6	260.5	24	10.31	286.3	546.8	54.68	5.4069	1.16207	0.853571	3.68621	1.49911	6.2
OS-WB: 800-200 nano	12	19	35	57	68	72	76	13	37.78	367.97	13	26.73	327.3	695.27	69.527	7.4	1.4	1	3.8	1.94737	4.9	5.61	3.92	0.39	0.75	87.97	5.28	4.89	<3	<3
OS-WB: 800-200 nano	14	23	36	61	70	73	76	12	38.74	338.66	10	27.94	276.46	615.12	61.512	6.1	1.2	0.8	3.4	1.60526	5.8	5.34	3.25	0.27	1.05	90.02	3.32	4.36	<3	<3
OS-WB: 800-200 nano	17	25	39	61	71	74	78	11	39.31	353.79	10	26.96	341.61	695.4	69.54	6.7	1.3	1.1	3.6	1.71795	5.6	5.9	3.63	0.42	0.93	88.74	4.01	5.15	<3	<3
OS-WB: 800-200 nano	15	23	36	60	71	74	77	8	41.23	319.24	9	28.22	296.96	616.2	61.62	6.2	1.3	0.9	3.7	1.67568	6.3
OS-WB: 800-200 nano	11	18	33	57	67	71	75	14	37.03	397.33	8	29.38	388. 42	722.75	72.275	7.7	1.3	1.6	4.4	1.75	6
OS-WB: 800-200 nano	16	23	37	60	69	72	77	10	40.87	326.96	6	29.45	301.65	628.61	62.861	6.4	1.3	1.2	3	2.13333	4.5
MAP -WB: 800-200	21	32	50	75	88	92	97	16	20.8	230.5	9	15.1	181	411.5	41.15	5	1.1	0.5	2.5	2	5.94	8.51	2.91	0.38	0.94	86.98	3.19	8.03	<3	<3
MAP -WB: 800-200	16	23	38	65	74	79	84	11	18.3	287.8	11	14	110.4	398.2	39.82	4	0.6	0.4	2.3	1.73913	6.16	7.96	3.38	0.42	1.05	87.56	3.01	8.11	<3	<3
MAP -WB: 800-200	23	30	48	76	86	89	93	12	19.2	320.6	12	14.2	160.8	481.4	48.14	4	0.6	0.5	3	1.33333	4.26	8.13	3.01	0.41	0.96	88.35	2.15	7.87	<3	<3
MAP -WB: 800-200	19	27	38	62	72	77	82	15	23	330.5	7	15.1	100.2	430.7	43.07	5.2	1.9	1	3.8	1.36842	5.64
MAP -WB: 800-200	18	29	42	67	73	78	83	11	22	286	8	14.8	110.8	396.8	39.68	4.6	1.1	0.5	2.6	1.76923	4.34
MAP -WB: 800-200	17	26	45	72	80	85	88	13	26.6	295.2	10	14.5	120.5	415.7	41.57	3.8	0.9	0.5	2.3	1.65217	4.18
MAP-WB : 800-200 nano	16	23	38	64	74	78	81	18.3	17.44	326.92	11	19.3	229.91	556.83	55.683	5.6	2	0.9	2.4	2.03448	4.6	9.35	3.98	0.21	0.98	88.36	1.1	8.21	<3	<3
MAP-WB : 800-200 nano	17	23	37	57	66	71	75	15.7	19.18	318.88	15	16.75	203.59	522.47	52.247	4.1	1.5	0.4	2.1	1.95238	5.1	9.83	3.84	0.35	1.24	86.24	2.34	8.42	<3	<3
MAP-WB : 800-200 nano	15	23	35	58	66	72	78	12.2	23.37	322.44	11	18.34	217.8	540.24	54.024	4.9	0.8	1	2.4	1.68966	6.2	9.33	3.63	0.27	1.13	87.1	2.17	8.26	<3	<3
MAP-WB : 800-200 nano	16	22	37	61	71	75	78	15.5	21.26	344.9	16	14.07	160.45	505.35	50.535	4.3	1.5	0.7	2.5	1.8	5.7
MAP-WB : 800-200 nano	15	22	34	63	70	75	79	14.8	22.23	325.45	10	21.32	241.45	566.9	56.69	6.3	1.7	1.1	4.2	1.64286	4.1
MAP-WB : 800-200 nano	17	24	37	59	70	73	80	15.5	20.36	339.76	16	15.29	180.3	520.06	52.006	5.1	2	3.1	3.3	1.69697	6.3
APP-WB : 800-200.	21	30	47	74	82	86	91	15	18.86	200.58	2	24.95	105.58	306.16	30.616	3.8	1	0.8	1.8	2.53333	3.5	9.06	3.54	0.32	1.12	83.64	5.86	10.75	<3	<3
APP-WB : 800-200.	19	27	43	71	83	87	92	12	19.78	203.78	4	23.62	101.69	305.47	30.547	4.5	1.3	0.6	2.8	1.875	4.7	9.33	4.03	0.28	1.23	84.32	4.84	11.42	<3	<3
APP-WB : 800-200.	18	25	40	67	83	86	90	9	22.38	316.69	5	22.76	100.96	417.65	41.765	6.1	1.8	1	3.4	2.06667	3.72	9.21	3.65	0.43	0.91	83.89	5.56	10.83	<3	<3
APP-WB : 800-200.	15	22	40	70	80	83	88	8	20.27	210.21	7	17.53	104.03	314.24	31.424	4.6	1.6	1.2	2.9	1.58621	4.28
APP-WB : 800-200.	18	26	43	70	78	83	87	8	20.94	244.7	5	23.99	103.07	347.77	34.777	4.7	1.7	1.2	2.7	2.28571	5.6
APP-WB : 800-200.	20	28	42	71	83	89	93	10	22.96	320.76	6	21.62	106.38	427.14	42.714	6.5	1.5	2.5	4.3	1.58537	3.56
APP-WB:800-200 nano	21	28	45	68	78	82	86	6	36.34	327.32	7	20.51	138.84	466.16	46.616	6.2	1.5	1.8	3.7	1.62162	4.5	10.63	2.54	0.32	1.45	84.33	3.27	11.23	<3	<3
APP-WB:800-200 nano	23	32	47	73	81	86	89	3	38.93	345.67	9	22.38	151.56	497.23	49.723	6.4	1.7	1.8	3.8	1.7	3.8	11.22	2.32	0.46	1.22	84.53	2.57	11.02	<3	<3
APP-WB:800-200 nano	16	24	42	67	77	82	87	9	34.28	309.13	10	19.75	137.39	446.52	44.652	4.8	1.4	0.7	3.8	1.21053	5.3	10.71	2.65	0.4	1.39	83.75	3.75	11.35	<3	<3
APP-WB:800-200 nano	16	23	37	66	75	81	86	10	32.33	289.84	15	18.94	144.21	434.05	43.405	4.7	1.3	0.7	3.1	1.35484	4.9
APP-WB:800-200 nano	21	28	41	69	79	83	89	5	37.41	332.35	19	20.92	139.33	471.68	47.168	5.9	1.3	1.3	3.2	1.8125	3.6
APP-WB:800-200 nano	16	25	44	68	77	80	85	5	38.79	272.78	17	19.03	145.44	418.22	41.822	3.8	1.1	1	2.7	1.40741	4.4
